# Supplementary material
Source: PubMed Central journal article supplement (PMC3928794)

Supporting Information for

Antiproliferative triterpene saponins from *Nematostylis anthophylla* from  
the Madagascar Dry Forest

Yumin Dai, Liva Harinantenaina, Peggy J. Brodie, Chris Birkinshaw, Richard Randrianaivo, Wendy Applequist, Michel Ratsimbason, Vincent E. Rasamison, Yongchun Shen, Karen TenDyke, and David G. I. Kingston\*

NMR spectra for compounds **2** and **3**

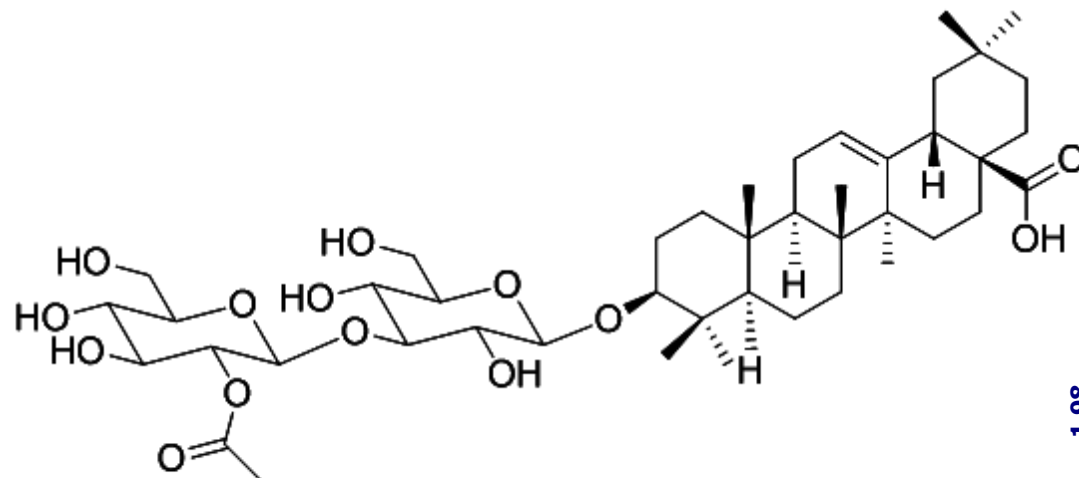

Compound 2 ( $^1\text{H-NMR}$  Pyridine- $\text{d}_5$ , 500Hz)

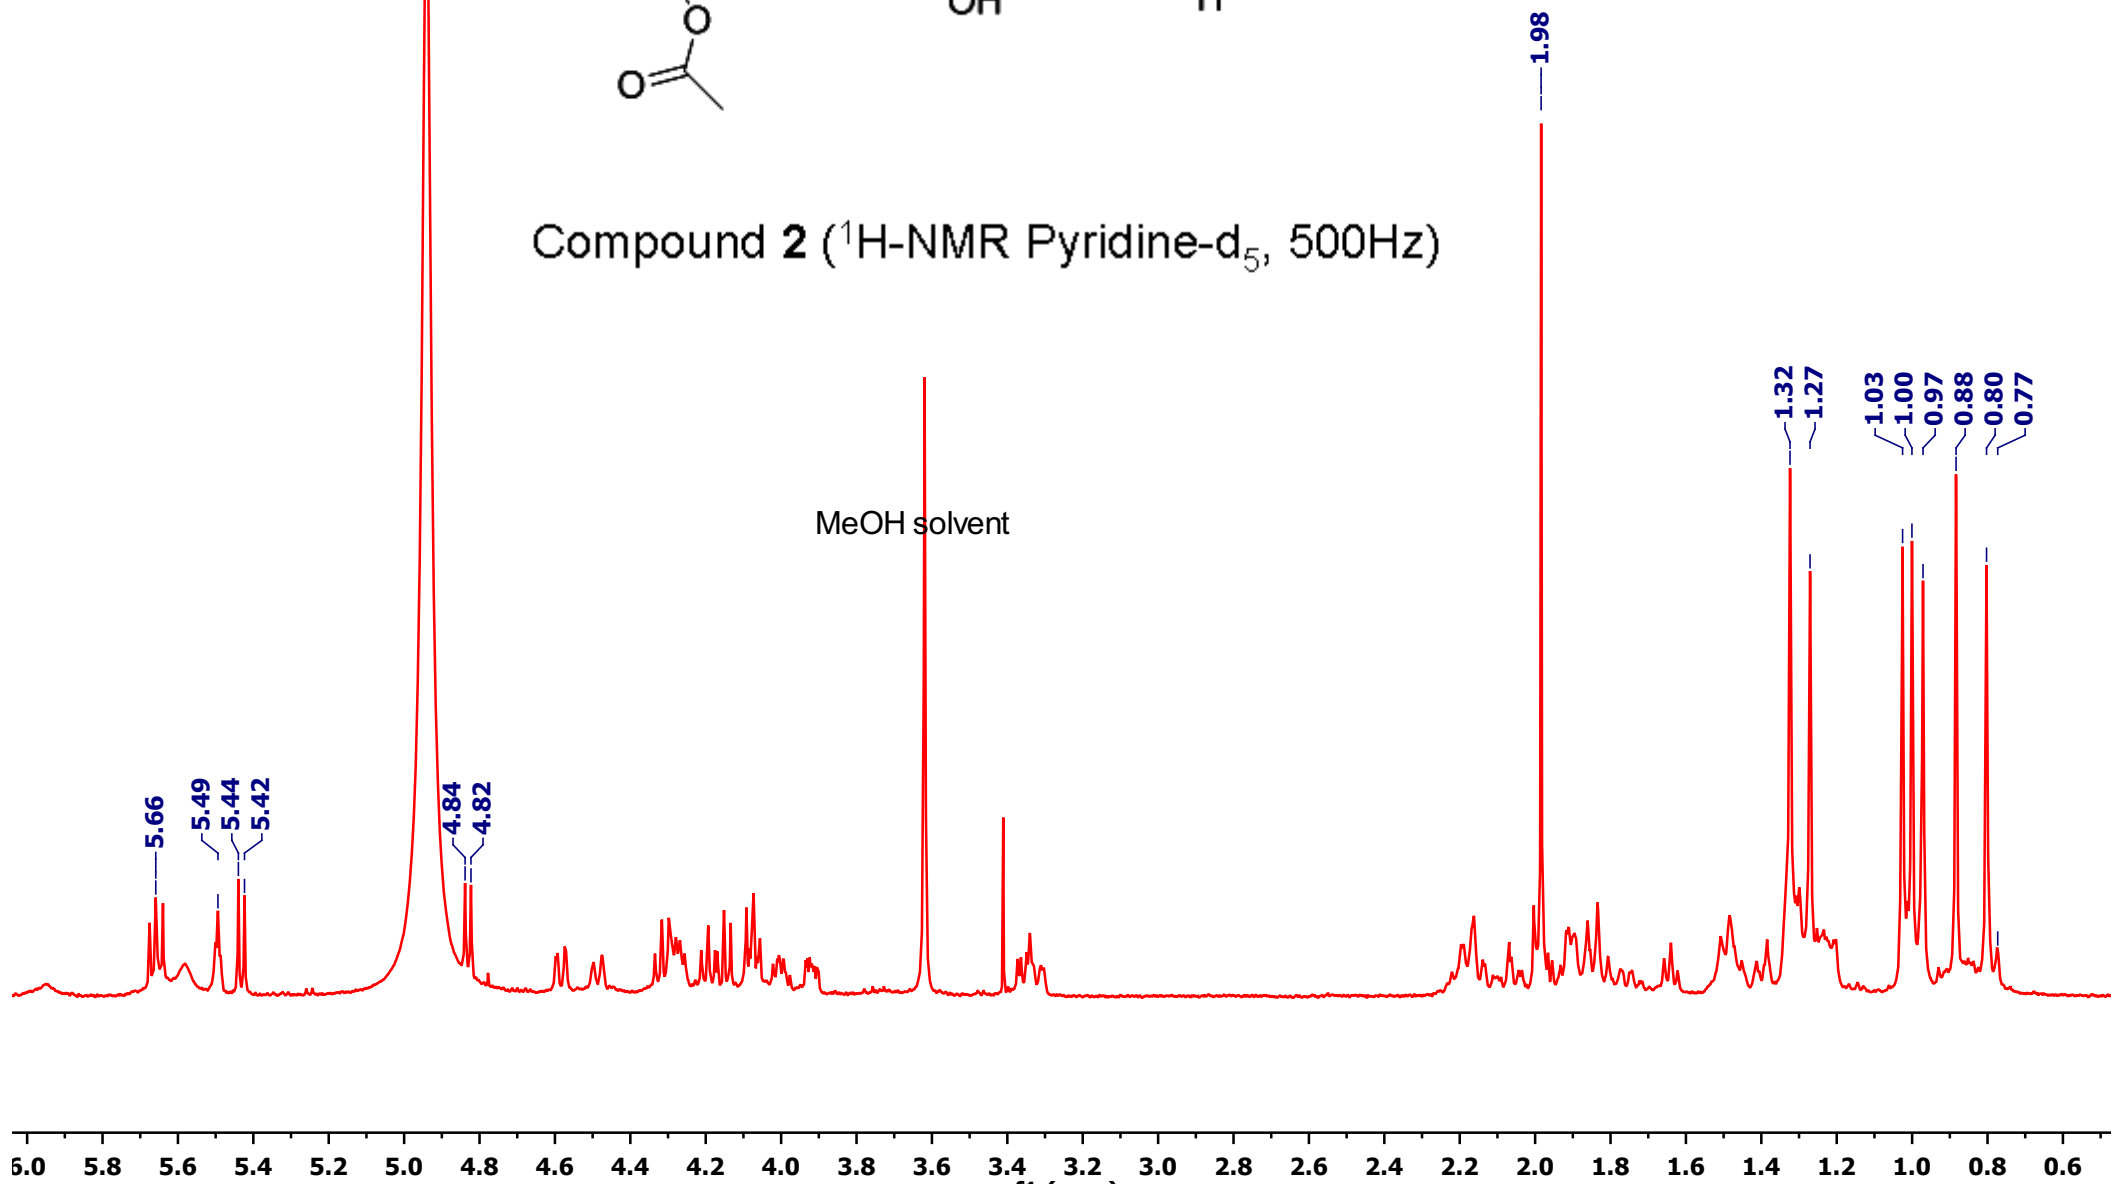

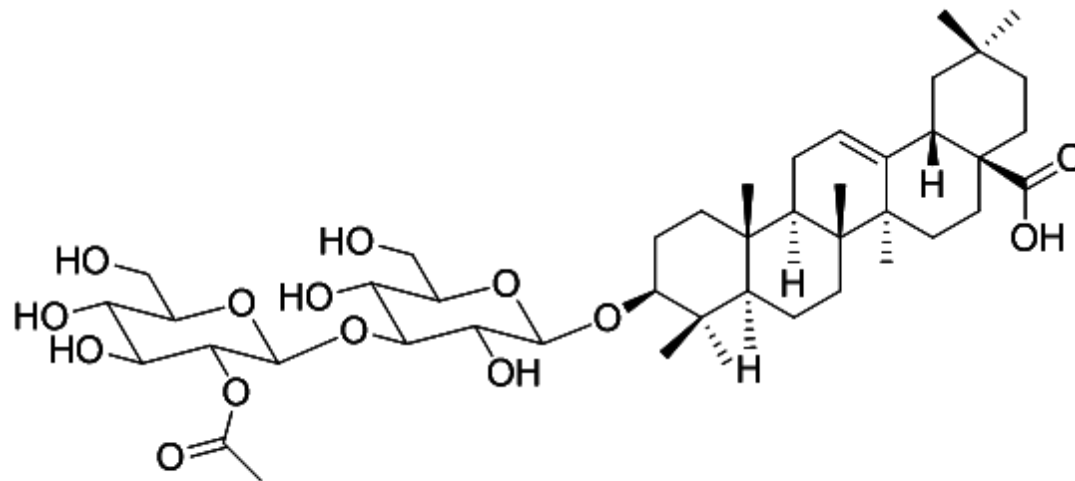

Compound 2 ( $^{13}\text{C}$ -NMR Pyridine- $d_5$ , 500Hz)

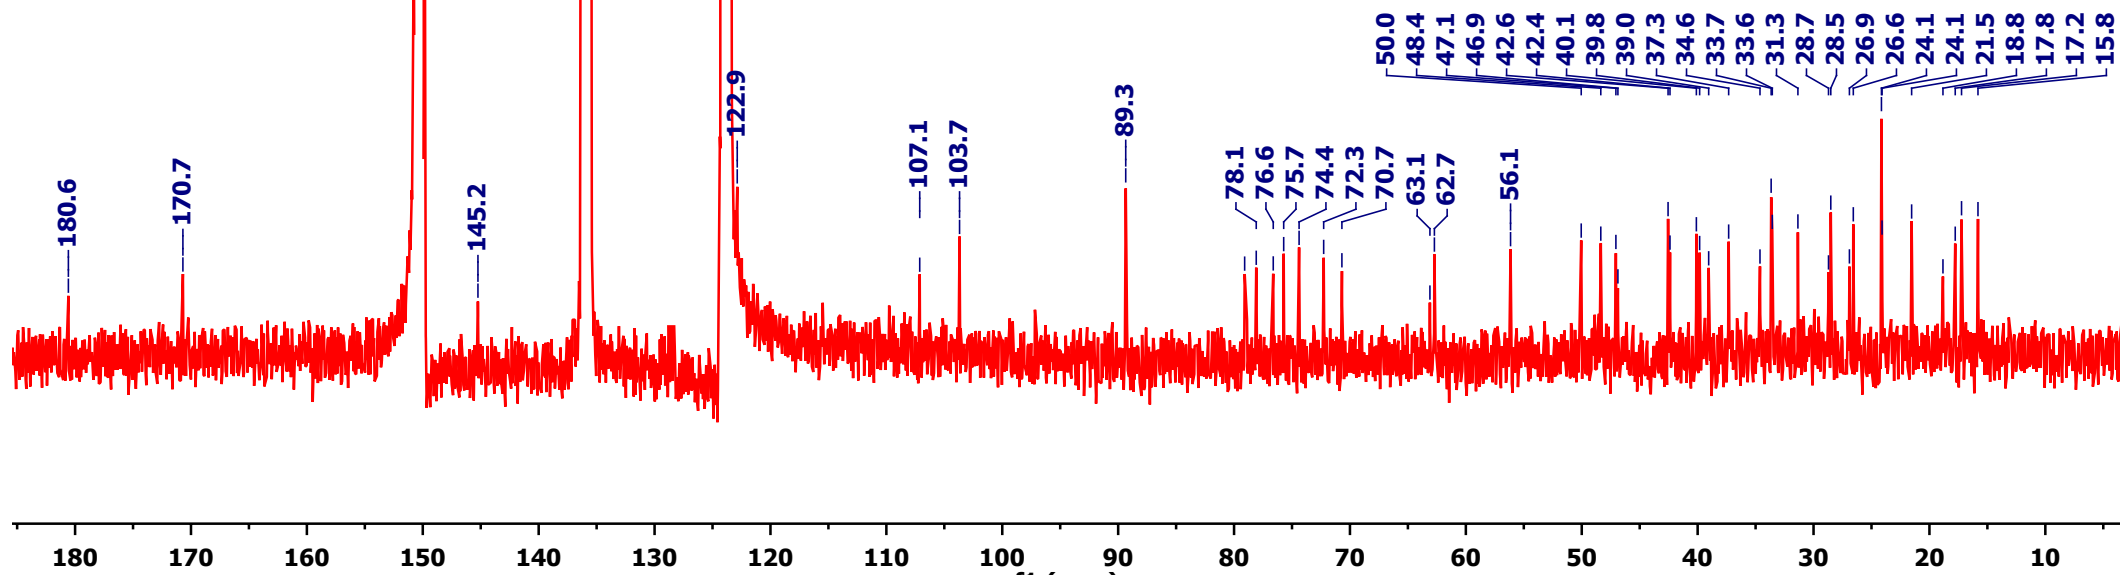

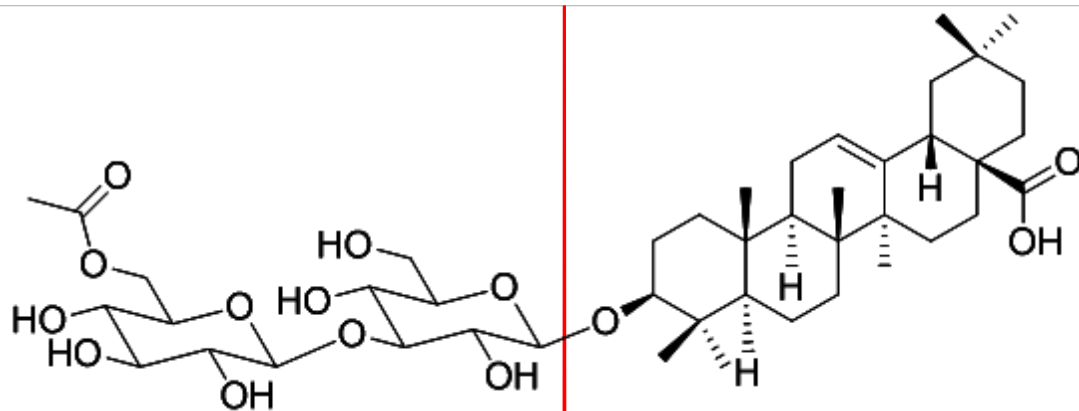

Compound 3 ( $^1\text{H-NMR}$  Pyridine- $\text{d}_5$ , 500Hz)

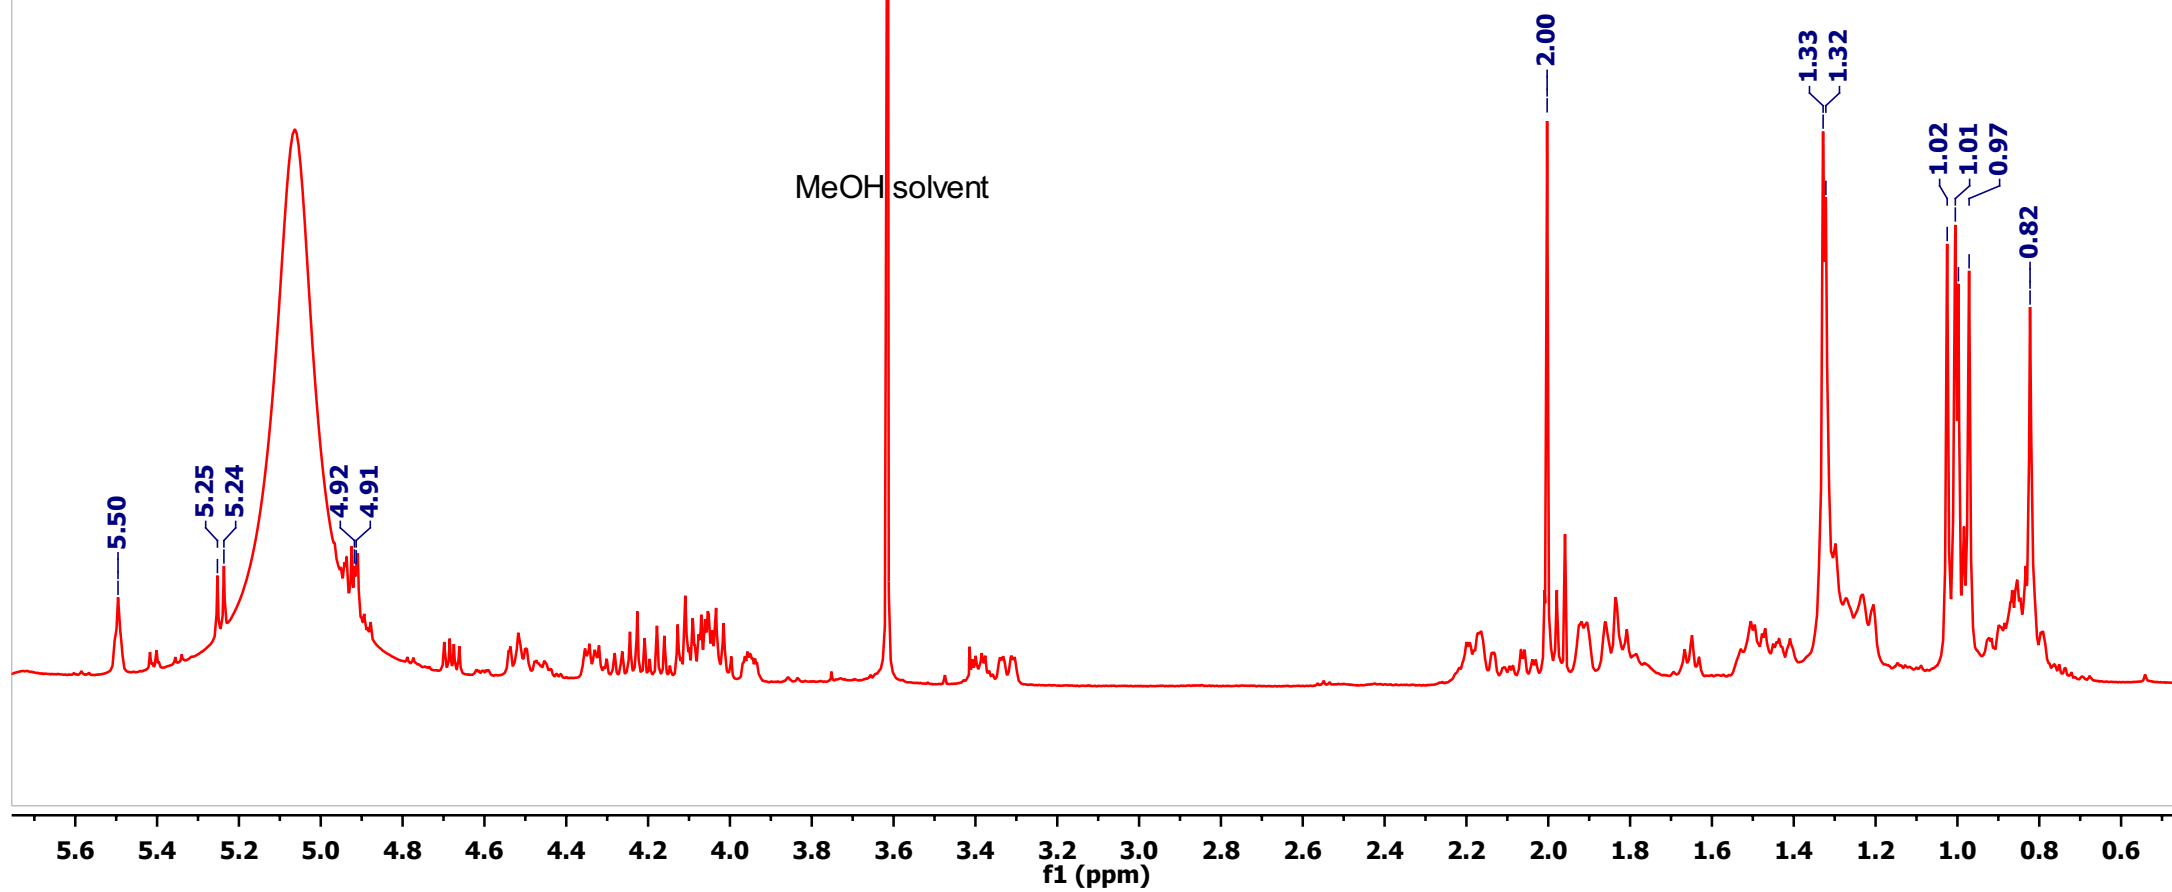

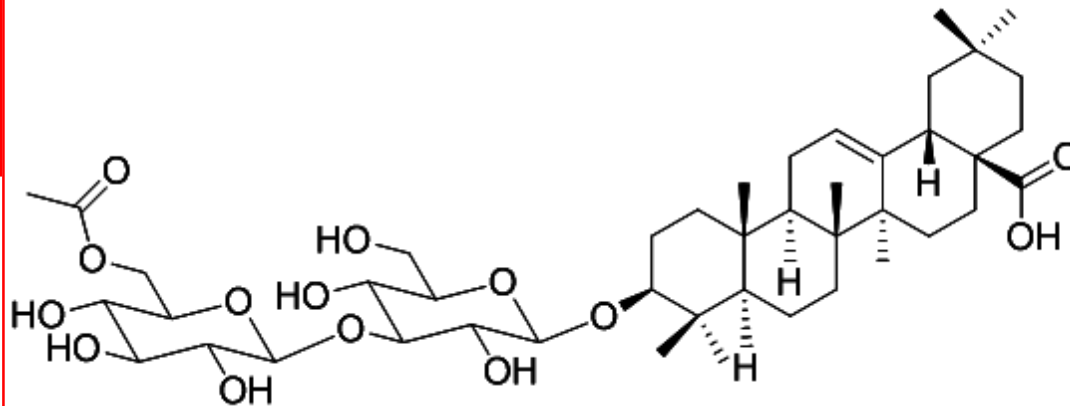

Compound **3** ( $^{13}\text{C}$ -NMR Pyridine- $\text{d}_5$ , 500Hz)

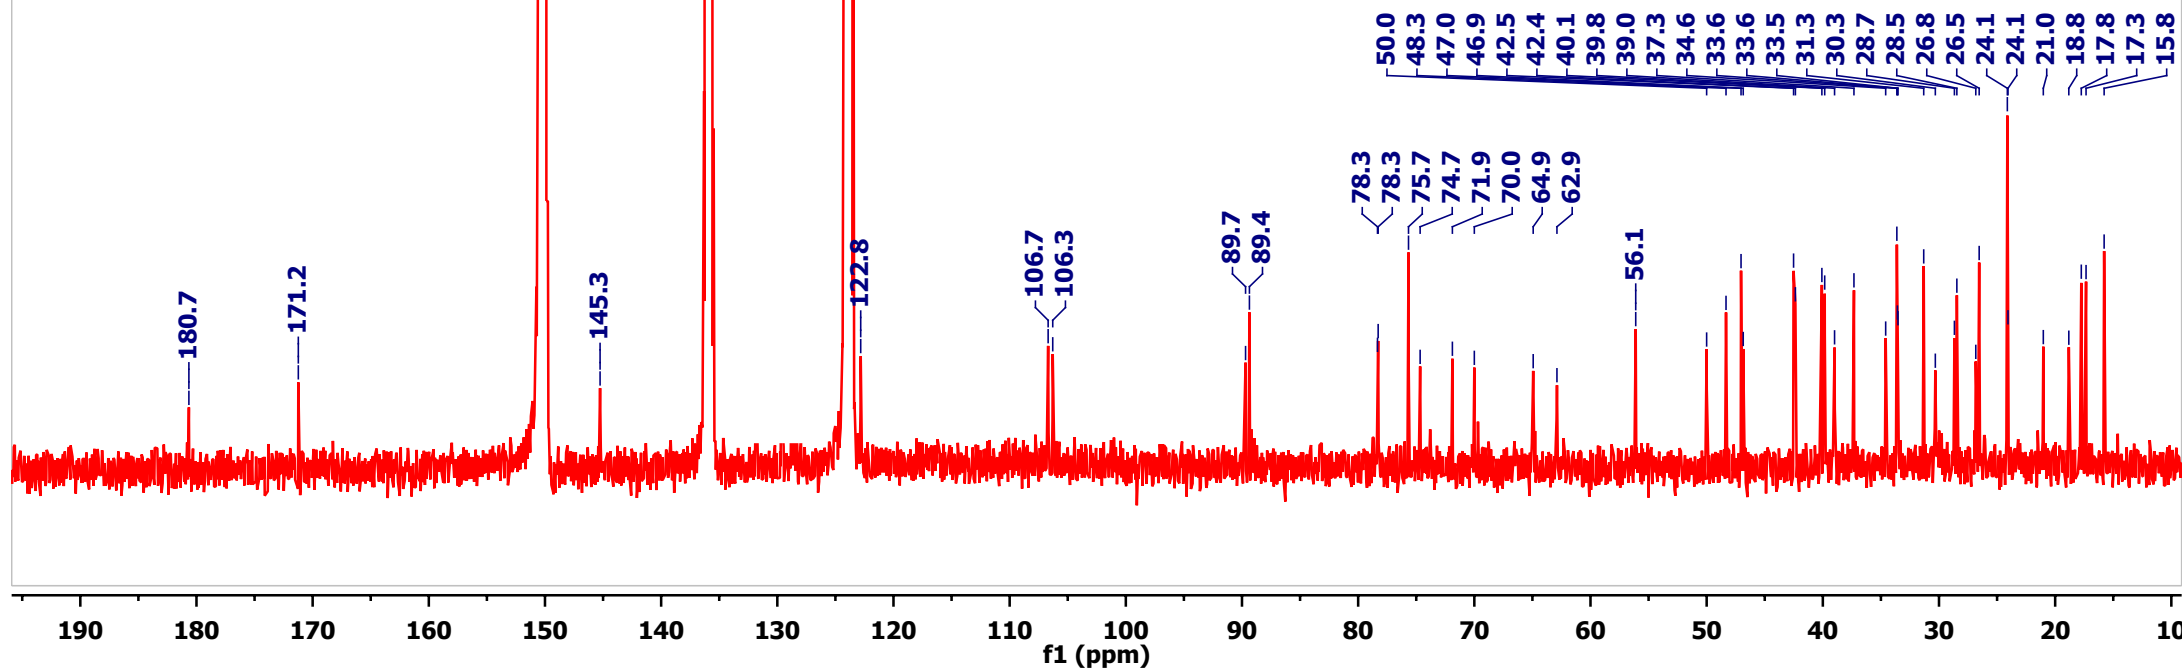

Supplement: NIHMS544591-supplement-Supporting_Information.pdf [file NIHMS544591-supplement-Supporting_Information.pdf]
